# Supplementary material for: Air Quality in the Harbin-Changchun Metropolitan Area in Northeast China: Unique Episodes and New Trends
Source: MDPI journal article supplement (doi:10.3390/toxics9120357), 2021-12-17
Supplement: s1 [file s1]

# Air quality in the Harbin-Changchun metropolitan area in Northeast China: unique episodes and new trends

Yulong Wang, Youwen Sun, Gerong Zhao and Yuan Cheng

## S1. The detection methods of the six criteria air pollutants

According to the HJ655-2013, the concentrations of PM<sub>2.5</sub> and PM<sub>10</sub> are measured by the micro oscillating balance method and the  $\beta$  absorption method, respectively. According to the HJ193-2013, the ultraviolet fluorescence method, chemiluminescence method, and UV-spectrophotometry method are used to measure the mass concentration of SO<sub>2</sub>, NO<sub>2</sub>, and O<sub>3</sub>, respectively. Besides, the gas filter correlation infrared absorption method and the non-dispersive infrared absorption method are used to measure the CO concentration.

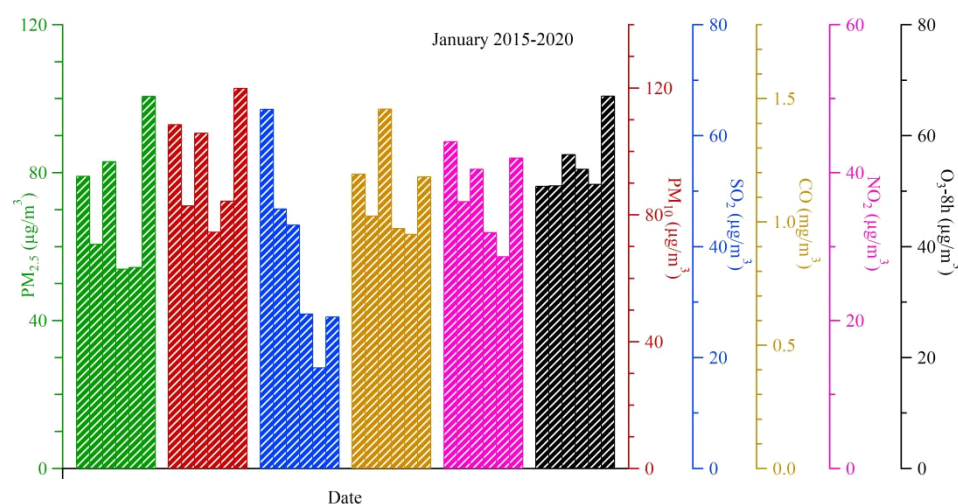

**Figure S1.** The concentration of six pollutants in HC from 2015 to 2020 in January. From left to right represent the years from 2015 to 2020, respectively.

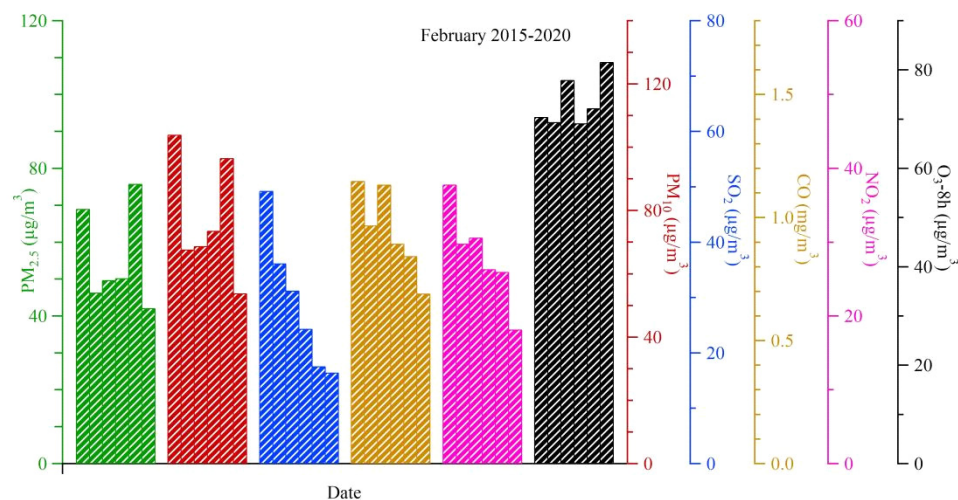

**Figure S2.** The concentration of six pollutants in HC from 2015 to 2020 in February. From left to right represent the years from 2015 to 2020, respectively.

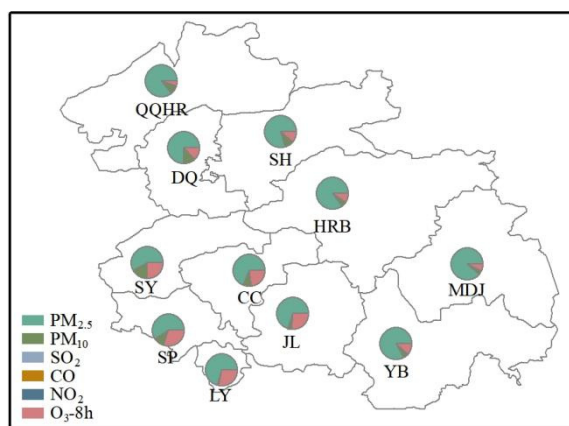

**Figure S3.** The proportion of the major pollutants during non-attainment periods in the 11 cities of HC.

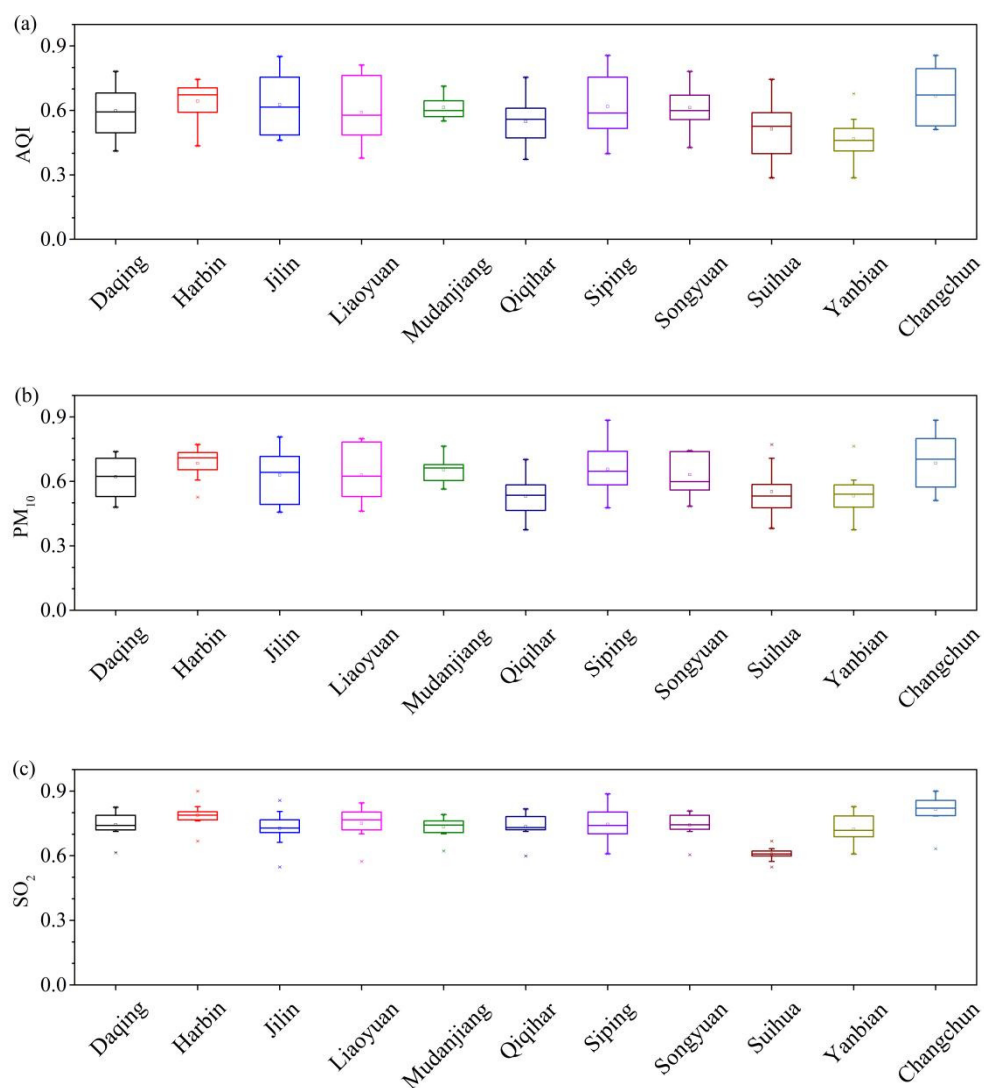

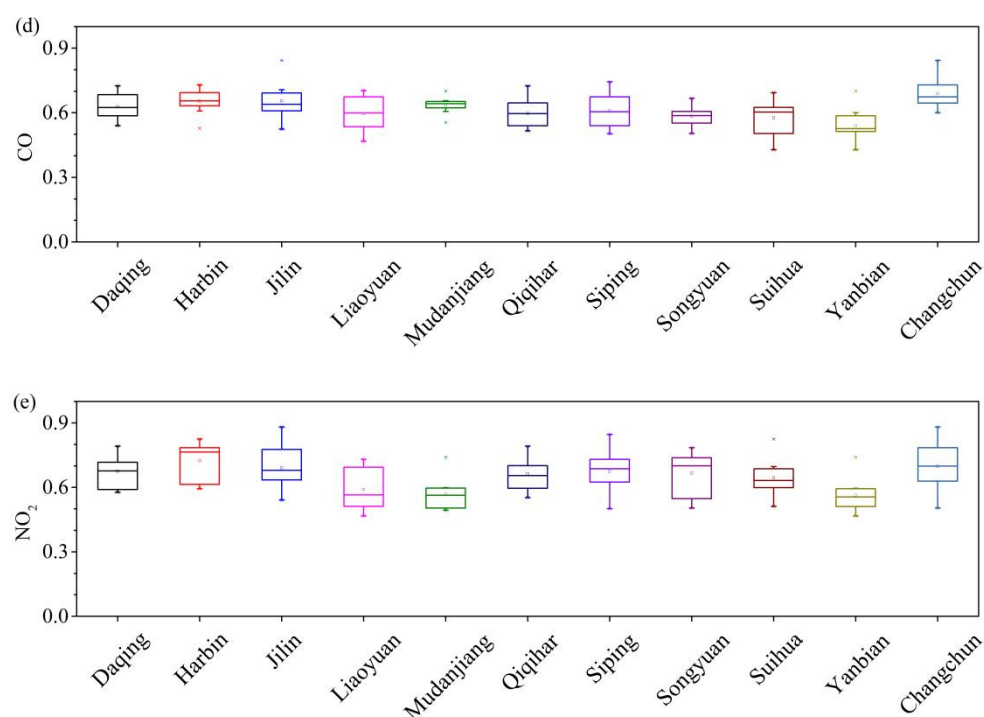

**Figure S4.** The box plot of Pearson correlation coefficient of different pollutants for each city with other cities in HC. (a) AQI, (b) PM<sub>10</sub>, (c) SO<sub>2</sub>, (d) CO, and (e) NO<sub>2</sub>.

**Table S1.** The Pearson Correlation of AQI in HC.

| Cities     | Daqing  | Harbin  | Jilin   | Liaoyuan | Mudanjiang | Qiqihar | Siping  | Songyuan | Suihua  | Yanbian | Changchun |
|------------|---------|---------|---------|----------|------------|---------|---------|----------|---------|---------|-----------|
| Daqing     | 1       |         |         |          |            |         |         |          |         |         |           |
| Harbin     | 0.681** | 1       |         |          |            |         |         |          |         |         |           |
| Jilin      | 0.486** | 0.675** | 1       |          |            |         |         |          |         |         |           |
| Liaoyuan   | 0.496** | 0.584** | 0.763** | 1        |            |         |         |          |         |         |           |
| Mudanjiang | 0.607** | 0.713** | 0.645** | 0.571**  | 1          |         |         |          |         |         |           |
| Qiqihar    | 0.754** | 0.634** | 0.477** | 0.441**  | 0.592**    | 1       |         |          |         |         |           |
| Siping     | 0.524** | 0.591** | 0.755** | 0.811**  | 0.584**    | 0.472** | 1       |          |         |         |           |
| Songyuan   | 0.782** | 0.670** | 0.586** | 0.589**  | 0.557**    | 0.610** | 0.671** | 1        |         |         |           |
| Suihua     | 0.668** | 0.745** | 0.461** | 0.378**  | 0.551**    | 0.589** | 0.399** | 0.540**  | 1       |         |           |
| Yanbian    | 0.411** | 0.435** | 0.559** | 0.486**  | 0.678**    | 0.372** | 0.516** | 0.427**  | 0.286** | 1       |           |
| Changchun  | 0.578** | 0.705** | 0.851** | 0.795**  | 0.641**    | 0.528** | 0.856** | 0.702**  | 0.512** | 0.511** | 1         |

\*\* Correlation is significant at the 0.01 level.

**Table S2.** The Pearson Correlation of PM<sub>2.5</sub> in HC.

| Cities     | Daqing  | Harbin  | Jilin   | Liaoyuan | Mudanjiang | Qiqihar | Siping | Songyuan | Suihua | Yanbian | Changchun |
|------------|---------|---------|---------|----------|------------|---------|--------|----------|--------|---------|-----------|
| Daqing     | 1       |         |         |          |            |         |        |          |        |         |           |
| Harbin     | 0.762** | 1       |         |          |            |         |        |          |        |         |           |
| Jilin      | 0.549** | 0.716** | 1       |          |            |         |        |          |        |         |           |
| Liaoyuan   | 0.581** | 0.644** | 0.805** | 1        |            |         |        |          |        |         |           |
| Mudanjiang | 0.692** | 0.732** | 0.691** | 0.679**  | 1          |         |        |          |        |         |           |

|                  |         |         |         |         |         |         |         |         |         |         |   |
|------------------|---------|---------|---------|---------|---------|---------|---------|---------|---------|---------|---|
| <b>Qiqihar</b>   | 0.682** | 0.622** | 0.542** | 0.531** | 0.610** | 1       |         |         |         |         |   |
| <b>Siping</b>    | 0.620** | 0.649** | 0.765** | 0.854** | 0.658** | 0.550** | 1       |         |         |         |   |
| <b>Songyuan</b>  | 0.779** | 0.744** | 0.686** | 0.729** | 0.683** | 0.617** | 0.813** | 1       |         |         |   |
| <b>Suihua</b>    | 0.657** | 0.794** | 0.500** | 0.440** | 0.583** | 0.547** | 0.438** | 0.534** | 1       |         |   |
| <b>Yanbian</b>   | 0.534** | 0.536** | 0.594** | 0.570** | 0.776** | 0.463** | 0.555** | 0.553** | 0.369** | 1       |   |
| <b>Changchun</b> | 0.671** | 0.744** | 0.839** | 0.862** | 0.694** | 0.590** | 0.891** | 0.834** | 0.555** | 0.563** | 1 |

\*\* Correlation is significant at the 0.01 level.

**Table S3.** The Pearson Correlation of PM<sub>10</sub> in HC.

| Cities            | Daqing  | Harbin  | Jilin   | Liaoyuan | Mudanjiang | Qiqihar | Siping  | Songyuan | Suihua  | Yanbian | Changchun |
|-------------------|---------|---------|---------|----------|------------|---------|---------|----------|---------|---------|-----------|
| <b>Daqing</b>     | 1       |         |         |          |            |         |         |          |         |         |           |
| <b>Harbin</b>     | 0.734** | 1       |         |          |            |         |         |          |         |         |           |
| <b>Jilin</b>      | 0.484** | 0.697** | 1       |          |            |         |         |          |         |         |           |
| <b>Liaoyuan</b>   | 0.530** | 0.654** | 0.783** | 1        |            |         |         |          |         |         |           |
| <b>Mudanjiang</b> | 0.654** | 0.723** | 0.678** | 0.670**  | 1          |         |         |          |         |         |           |
| <b>Qiqihar</b>    | 0.702** | 0.606** | 0.457** | 0.465**  | 0.564**    | 1       |         |          |         |         |           |
| <b>Siping</b>     | 0.593** | 0.662** | 0.716** | 0.783**  | 0.633**    | 0.490** | 1       |          |         |         |           |
| <b>Songyuan</b>   | 0.739** | 0.731** | 0.580** | 0.594**  | 0.604**    | 0.560** | 0.740** | 1        |         |         |           |
| <b>Suihua</b>     | 0.708** | 0.772** | 0.493** | 0.461**  | 0.586**    | 0.584** | 0.477** | 0.536**  | 1       |         |           |
| <b>Yanbian</b>    | 0.480** | 0.527** | 0.606** | 0.554**  | 0.764**    | 0.375** | 0.584** | 0.484**  | 0.381** | 1       |           |
| <b>Changchun</b>  | 0.593** | 0.736** | 0.807** | 0.799**  | 0.671**    | 0.511** | 0.885** | 0.743**  | 0.528** | 0.574** | 1         |

\*\* Correlation is significant at the 0.01 level.

**Table S4.** The Pearson Correlation of SO<sub>2</sub> in HC.

| Cities            | Daqing  | Harbin  | Jilin   | Liaoyuan | Mudanjiang | Qiqihar | Siping  | Songyuan | Suihua  | Yanbian | Changchun |
|-------------------|---------|---------|---------|----------|------------|---------|---------|----------|---------|---------|-----------|
| <b>Daqing</b>     | 1       |         |         |          |            |         |         |          |         |         |           |
| <b>Harbin</b>     | 0.681** | 1       |         |          |            |         |         |          |         |         |           |
| <b>Jilin</b>      | 0.486** | 0.675** | 1       |          |            |         |         |          |         |         |           |
| <b>Liaoyuan</b>   | 0.496** | 0.584** | 0.763** | 1        |            |         |         |          |         |         |           |
| <b>Mudanjiang</b> | 0.607** | 0.713** | 0.645** | 0.571**  | 1          |         |         |          |         |         |           |
| <b>Qiqihar</b>    | 0.754** | 0.634** | 0.477** | 0.441**  | 0.592**    | 1       |         |          |         |         |           |
| <b>Siping</b>     | 0.524** | 0.591** | 0.755** | 0.811**  | 0.584**    | 0.472** | 1       |          |         |         |           |
| <b>Songyuan</b>   | 0.782** | 0.670** | 0.586** | 0.589**  | 0.557**    | 0.610** | 0.671** | 1        |         |         |           |
| <b>Suihua</b>     | 0.668** | 0.745** | 0.461** | 0.378**  | 0.551**    | 0.589** | 0.399** | 0.540**  | 1       |         |           |
| <b>Yanbian</b>    | 0.411** | 0.435** | 0.559** | 0.486**  | 0.678**    | 0.372** | 0.516** | 0.427**  | 0.286** | 1       |           |
| <b>Changchun</b>  | 0.578** | 0.705** | 0.851** | 0.795**  | 0.641**    | 0.528** | 0.856** | 0.702**  | 0.512** | 0.511** | 1         |

\*\* Correlation is significant at the 0.01 level.

**Table S5.** The Pearson Correlation of CO in HC.

| Cities            | Daqing  | Harbin  | Jilin   | Liaoyuan | Mudanjiang | Qiqihar | Siping | Songyuan | Suihua | Yanbian | Changchun |
|-------------------|---------|---------|---------|----------|------------|---------|--------|----------|--------|---------|-----------|
| <b>Daqing</b>     | 1       |         |         |          |            |         |        |          |        |         |           |
| <b>Harbin</b>     | 0.689** | 1       |         |          |            |         |        |          |        |         |           |
| <b>Jilin</b>      | 0.609** | 0.707** | 1       |          |            |         |        |          |        |         |           |
| <b>Liaoyuan</b>   | 0.540** | 0.632** | 0.685** | 1        |            |         |        |          |        |         |           |
| <b>Mudanjiang</b> | 0.652** | 0.639** | 0.656** | 0.623**  | 1          |         |        |          |        |         |           |

|                  |         |         |         |         |         |         |         |         |         |         |   |
|------------------|---------|---------|---------|---------|---------|---------|---------|---------|---------|---------|---|
| <b>Qiqihar</b>   | 0.725** | 0.608** | 0.616** | 0.518** | 0.646** | 1       |         |         |         |         |   |
| <b>Siping</b>    | 0.546** | 0.643** | 0.692** | 0.674** | 0.606** | 0.540** | 1       |         |         |         |   |
| <b>Songyuan</b>  | 0.606** | 0.667** | 0.598** | 0.575** | 0.556** | 0.552** | 0.604** | 1       |         |         |   |
| <b>Suihua</b>    | 0.639** | 0.693** | 0.623** | 0.535** | 0.625** | 0.584** | 0.502** | 0.504** | 1       |         |   |
| <b>Yanbian</b>   | 0.586** | 0.528** | 0.524** | 0.468** | 0.701** | 0.516** | 0.528** | 0.513** | 0.428** | 1       |   |
| <b>Changchun</b> | 0.684** | 0.729** | 0.843** | 0.703** | 0.645** | 0.653** | 0.744** | 0.664** | 0.622** | 0.600** | 1 |

\*\* Correlation is significant at the 0.01 level.

**Table S6.** The Pearson Correlation of NO<sub>2</sub> in HC.

| Cities            | Daqing  | Harbin  | Jilin   | Liaoyuan | Mudanjiang | Qiqihar | Siping  | Songyuan | Suihua  | Yanbian | Changchun |
|-------------------|---------|---------|---------|----------|------------|---------|---------|----------|---------|---------|-----------|
| <b>Daqing</b>     | 1       |         |         |          |            |         |         |          |         |         |           |
| <b>Harbin</b>     | 0.789** | 1       |         |          |            |         |         |          |         |         |           |
| <b>Jilin</b>      | 0.665** | 0.777** | 1       |          |            |         |         |          |         |         |           |
| <b>Liaoyuan</b>   | 0.577** | 0.614** | 0.694** | 1        |            |         |         |          |         |         |           |
| <b>Mudanjiang</b> | 0.586** | 0.597** | 0.541** | 0.494**  | 1          |         |         |          |         |         |           |
| <b>Qiqihar</b>    | 0.792** | 0.752** | 0.647** | 0.553**  | 0.595**    | 1       |         |          |         |         |           |
| <b>Siping</b>     | 0.673** | 0.722** | 0.784** | 0.731**  | 0.501**    | 0.650** | 1       |          |         |         |           |
| <b>Songyuan</b>   | 0.717** | 0.785** | 0.738** | 0.548**  | 0.504**    | 0.701** | 0.700** | 1        |         |         |           |
| <b>Suihua</b>     | 0.681** | 0.825** | 0.635** | 0.512**  | 0.599**    | 0.687** | 0.625** | 0.697**  | 1       |         |           |
| <b>Yanbian</b>    | 0.590** | 0.594** | 0.552** | 0.467**  | 0.741**    | 0.596** | 0.511** | 0.520**  | 0.560** | 1       |           |
| <b>Changchun</b>  | 0.685** | 0.785** | 0.881** | 0.713**  | 0.517**    | 0.660** | 0.847** | 0.753**  | 0.629** | 0.504** | 1         |

\*\* Correlation is significant at the 0.01 level.

**Table S7.** The Pearson Correlation of O<sub>3</sub>-8h in HC.

| Cities            | Daqing  | Harbin  | Jilin   | Liaoyuan | Mudanjiang | Qiqihar | Siping  | Songyuan | Suihua  | Yanbian | Changchun |
|-------------------|---------|---------|---------|----------|------------|---------|---------|----------|---------|---------|-----------|
| <b>Daqing</b>     | 1       |         |         |          |            |         |         |          |         |         |           |
| <b>Harbin</b>     | 0.843** | 1       |         |          |            |         |         |          |         |         |           |
| <b>Jilin</b>      | 0.746** | 0.770** | 1       |          |            |         |         |          |         |         |           |
| <b>Liaoyuan</b>   | 0.694** | 0.702** | 0.806** | 1        |            |         |         |          |         |         |           |
| <b>Mudanjiang</b> | 0.688** | 0.739** | 0.806** | 0.628**  | 1          |         |         |          |         |         |           |
| <b>Qiqihar</b>    | 0.854** | 0.787** | 0.691** | 0.599**  | 0.700**    | 1       |         |          |         |         |           |
| <b>Siping</b>     | 0.756** | 0.786** | 0.840** | 0.848**  | 0.709**    | 0.719** | 1       |          |         |         |           |
| <b>Songyuan</b>   | 0.869** | 0.829** | 0.768** | 0.729**  | 0.654**    | 0.749** | 0.821** | 1        |         |         |           |
| <b>Suihua</b>     | 0.776** | 0.823** | 0.683** | 0.553**  | 0.686**    | 0.746** | 0.706** | 0.719**  | 1       |         |           |
| <b>Yanbian</b>    | 0.590** | 0.623** | 0.730** | 0.619**  | 0.812**    | 0.618** | 0.629** | 0.588**  | 0.533** | 1       |           |
| <b>Changchun</b>  | 0.811** | 0.812** | 0.925** | 0.830**  | 0.769**    | 0.738** | 0.916** | 0.852**  | 0.726** | 0.690** | 1         |

\*\* Correlation is significant at the 0.01 level.
